# Supplementary material
Source: publisher figshare collection journal article supplement (https://tandf.figshare.com/ndownloader/files/20040338)
Supplement: Supplementary file 1 [file 20040338]

**Supplementary material for Rachidi et al. “Preoperative platelet counts and postoperative outcomes in cancer surgery: a multicenter, retrospective cohort study”.**

**Supplementary table I. Baseline variables adjusted for in the regression models.** aOR1 2010 and 2014. bOR2 2014. cOR2 2014 stratified. dOR2 2010. *Variable available in 2010 dataset only. #Outcome available in 2014 dataset only.

| **Baseline Variable\Outcome Variable** | **Mortality** | **Overall Complications** | **Cardiac** | **Resp** | **CNS** | **Urinary** | **Wound** | **Sepsis** | **Venous** | **Intra/postop transfusion** | **Hospitalization Time** | **30-day Readmission #** |
| --- | --- | --- | --- | --- | --- | --- | --- | --- | --- | --- | --- | --- |
| Age | a,b,c,d | a,b,c,d | a,b,c | a,b,c | a,b,c | a,b,c | a,b,c | a,b,c | a,b,c | a,b,c | a,b,c,d | a,b,c |
| Sex | a,b,c,d | a,b,c,d | a,b,c | a,b,c | a,b,c | a,b,c | a,b,c | a,b,c | a,b,c | a,b,c | a,b,c,d | a,b,c |
| Race | a,b,c,d | a,b,c,d | a,b,c | a,b,c | a,b,c | a,b,c | a,b,c | a,b,c | a,b,c | a,b,c | a,b,c,d | a,b,c |
| ASA class | a,b,c,d | a,b,c,d | a,b,c | a,b,c | a,b,c | a,b,c | a,b,c | a,b,c | a,b,c | a,b,c | a,b,c,d | a,b,c |
| Inpatient status | b,c,d | b,c,d | b,c | b,c | b,c | b,c | b,c | b,c | b,c | b,c | b,c,d | b,c |
| Preoperative transfusion | b,c,d | b,c,d | b,c | b,c | b,c | b,c | b,c | b,c | b,c | b,c | b,c,d | b,c |
| Functional status | a,b,c,d | a,b,c,d | a,b,c | a,b,c | a,b,c | a,b,c | a,b,c | a,b,c | a,b,c | a,b,c | a,b,c,d | a,b,c |
| History of CHF | b,c,d | b,c,d | b,c | b,c | b,c | b,c | b,c | b,c | b,c | b,c | b,c,d | b,c |
| Dyspnea |  |  |  | b,c |  |  |  |  |  |  |  |  |
| Hypertension requiring medication |  |  | b,c |  | b,c |  |  |  |  |  |  |  |
| Tobacco use in past year | b,c,d | b,c,d | b,c | b,c | b,c | b,c | b,c | b,c | b,c | b,c | b,c,d | b,c |
| History of COPD | b,c,d | b,c,d | b,c | b,c | b,c | b,c | b,c | b,c | b,c | b,c | b,c,d | b,c |
| Ventilator-dependent in previous 48h |  |  |  | b,c |  |  |  | b,c |  |  |  |  |
| Renal failure | b,c,d | b,c,d | b,c | b,c | b,c | b,c | b,c | b,c | b,c | b,c | b,c,d | b,c |
| Bleeding disorder | b,c,d | b,c,d | b,c | b,c | b,c | b,c | b,c | b,c | b,c | b,c | b,c,d | b,c |
| Disseminated cancer | b,c,d | b,c,d | b,c | b,c | b,c | b,c | b,c | b,c | b,c | b,c | b,c,d | b,c |
| Diabetic on oral hypoglycemic or insulin | b,c,d | b,c,d | b,c | b,c | b,c | b,c | b,c | b,c | b,c | b,c | b,c,d | b,c |
| Wound class |  |  |  |  |  |  | b,c | b,c |  |  |  |  |
| Steroid use |  |  |  |  |  |  | b,c | b,c |  | b,c |  |  |
| Preoperative sepsis |  |  |  |  |  |  | b,c | b,c |  |  |  |  |
| Preoperative hematocrit | c | c |  |  |  |  |  |  |  |  | c | c |
| Postoperative diagnosis | c | c |  |  |  |  |  |  |  |  | c | c |
| Work RVU | a,b,c,d | a,b,c,d | a,b,c | a,b,c | a,b,c | a,b,c | a,b,c | a,b,c | a,b,c | a,b,c | a,b,c,d | a,b,c |
| Ethanol >2 drinks/day in 2 weeks before admission* | d | d |  |  |  |  |  |  |  |  | d |  |
| CVA with neurological deficit* | d | d |  |  |  |  |  |  |  |  | d |  |
| CVA without neurological deficit* | d | d |  |  |  |  |  |  |  |  | d |  |
| Radiotherapy in the last 90 days* | d | d |  |  |  |  |  |  |  |  | d |  |
| Chemotherapy in 30 days before surgery* | d | d |  |  |  |  |  |  |  |  | d |  |

Table continued

**Supplementary Table II. Frequencies of missing variables in the 2014 database.**

| **Variable** | **Count missing (% of analyzed patients)** |
| --- | --- |
| **Age** | 0 |
| **Sex** | 0 |
| **Race** | 0 |
| **Surgical subspecialty** | 0 |
| **Work RVU** | 0 |
| **Type of anesthesia** | 0 |
| **ASA class** | 0 |
| **Wound class** | 0 |
| **Total operation time** | 0 |
| **Inpatient/outpatient status** | 0 |
| **Days from admission to operation** | 0 |
| **Emergency case** | 0 |
| **Preoperative transfusion** | 0 |
| **Functional status** | 0 |
| **Dyspnea** | 0 |
| **Congestive heart failure in previous 30 days** | 0 |
| **Hypertension requiring medication** | 0 |
| **Tobacco use in past year** | 0 |
| **History of severe COPD** | 0 |
| **Ventilator-dependent in previous 48 h** | 0 |
| **Ascites in previous 30 days** | 0 |
| **Acute renal failure** | 0 |
| **Presently on dialysis** | 0 |
| **Bleeding disorder** | 0 |
| **Weight loss >10% in previous 6 months** | 0 |
| **Disseminated cancer** | 0 |
| **Body-mass index** | 0 |
| **Diabetic on oral drugs or insulin** | 0 |
| **Open wound (with or without infection)** | 0 |
| **Steroid use for chronic condition** | 0 |
| **Systemic sepsis in previous 48 h** | 0 |
| **Days from platelet measurement to operation** | 0 |
| **Serum sodium** | 4,429 (4.88) |
| **Serum creatinine** | 3,172 (3.50) |
| **BUN** | 7,245 (7.99) |
| **Albumin** | 28,028 (30.89) |
| **Total bilirubin** | 28,213 (31.09) |
| **AST** | 28,207 (31.09) |
| **Alkaline phosphatase** | 27,832 (30.67) |
| **WBC** | 207 (0.23) |
| **INR** | 42,754 (47.12) |
| **HCT** | 194 (0.02) |
| **PTT** | 51,838 (57.13) |

Table continued
